# Supplementary material for: Synthesis and enhanced electrochemical performance of Li2CoPO4F cathodes under high current cycling
Source: Royal Society of Chemistry journal article supplement (doi:10.1039/c2cp41624g), 2012-01-01
Supplement: c2cp41624g.pdf [file c2cp41624g.pdf]

## Supplementary information

### Synthesis and enhanced electrochemical performance of 5 V, $\text{Li}_2\text{CoPO}_4\text{F}$ cathodes under high current cycling

S. Amaresh<sup>a</sup>, G.J. Kim<sup>a</sup>, V. Aravindan<sup>a,b</sup>, K.Y. Chung<sup>c</sup>, B.W. Cho<sup>c</sup>, and Y.S. Lee<sup>a,\*</sup>

<sup>a</sup>Faculty of Applied Chemical Engineering, Chonnam National University,  
Gwang-ju 500-757, Korea

<sup>b</sup>Energy Research Institute (ERI@N), Nanyang Technological University, Research Techno  
Plaza, 50 Nanyang Drive, Singapore 637553

<sup>c</sup>Center for Energy Convergence, Korea Institute of Science and Technology,  
Seoul 136-791, Korea

---

\* Corresponding author.

Tel. & Fax : +82 62 530 1904,

E-mail address: [leeys@chonnam.ac.kr](mailto:leeys@chonnam.ac.kr) (Y.S. Lee).

### Electrochemical performance of $\text{Li}_2\text{CoPO}_4\text{F}$ cathodes with different electrolyte solutions

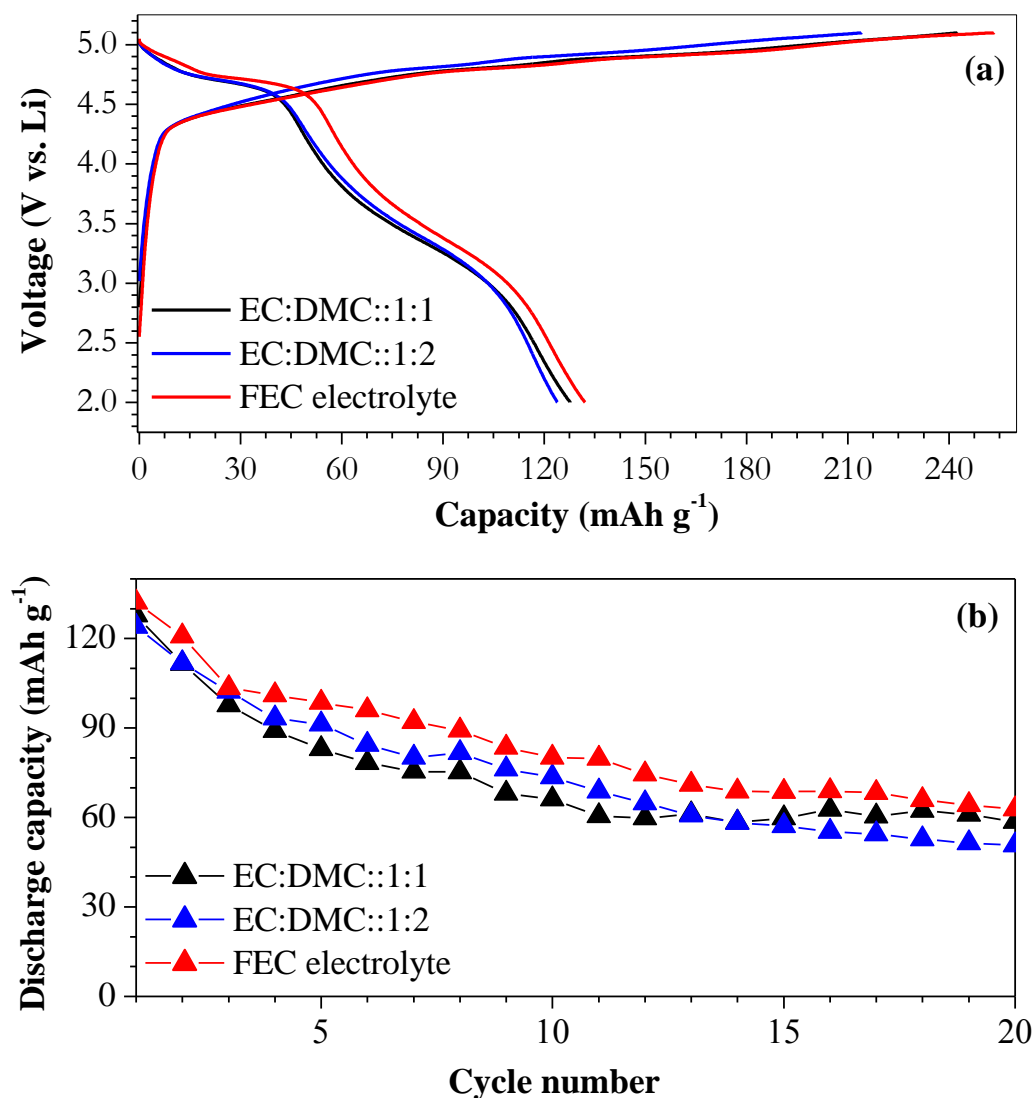

Figure S1: Initial charge-discharge curves (a) and cycle life studies (b) of  $\text{Li}_2\text{CoPO}_4\text{F}$  cathode active material synthesized at  $700\text{ }^\circ\text{C}$

The electrochemical profiles of  $\text{Li}_2\text{CoPO}_4\text{F}$  (synthesized at  $700\text{ }^\circ\text{C}$  for 1.5 h) was evaluated with commercially available  $\text{LiPF}_6$  based electrolyte solutions. More clearly, different ratios of solvents ethylene carbonate (EC) and dimethyl carbonate (DMC) likely 1:1 and 1:2 by volume were used and compared with fluoro-ethylene carbonate (FEC) additive. Hereafter, those electrolytes were named for convenience as DMC1 (1:1 ratio) and DMC2 (1:1 ratio), respectively. The half-cells

were assembled according to the procedure described in the experimental section for FEC additive. Galvanostatic cycling studies were conducted between 2 -5.1 V *vs.* Li at constant current rate of C/12 and given in figure S1. Li/Li<sub>2</sub>CoPO<sub>4</sub>F cell exhibited the similar kind of discharge curves, irrespective of the electrolyte. Test cell delivered the discharge capacity of 127, 123 and 132 mAh g<sup>-1</sup> for DMC1, DMC2 and FEC additive, respectively. After 20 cycles, capacity retention of 41, 46 and 49% is noted for DMC1, DMC2 and FEC additive based electrolytes, respectively.
